# Supplementary material
Source: publisher figshare collection journal article supplement (https://acs.figshare.com/ndownloader/files/5129527)

Confocal images of QD accumulation (orange) after 16 hours of incubation (~1 mg/ml QD) with neurons in basal media. Neurons identified by nuclear staining for NeuN with FITC (green) labeled antimouse secondary antibody (Molecular Probes, Eugene OR).

**Supplemental figure 1** shows successive confocal images focusing down through the cells showing localization within the neurons.

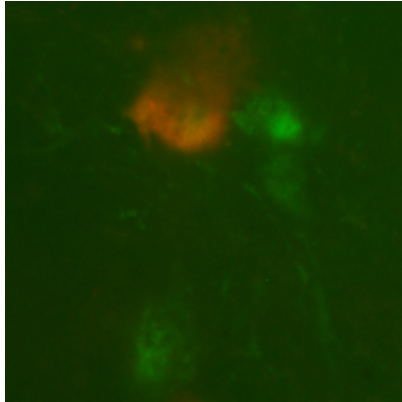

**Supplemental figure 2** is a 3D reconstruction of supplemental figure 1 further confirming subcellular accumulation. Confocal images were obtained with a Nikon Eclipse TE2000-U inverted microscope with a CARV spinning disk confocal unit (Atto Biosciences) using a 40x oil objective (n.a. = 1.0). Optical sections were taken every micron. QDs were imaged using <460nm excitation and 585nm emission filter (Chroma Technology Corp) and FITC was imaged with a 484nm excitation filter and 518 nm emission filter (Chroma Technology Corp.).

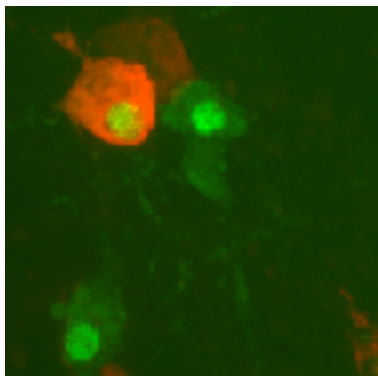

Supplement: Supplementary file 1 [file 5129527]
